# Supplementary material
Source: PubMed Central journal article supplement (PMC2605910)
Supplement: pbio.0060308.sg002.pdf [file pbio.0060308.sg002.pdf]

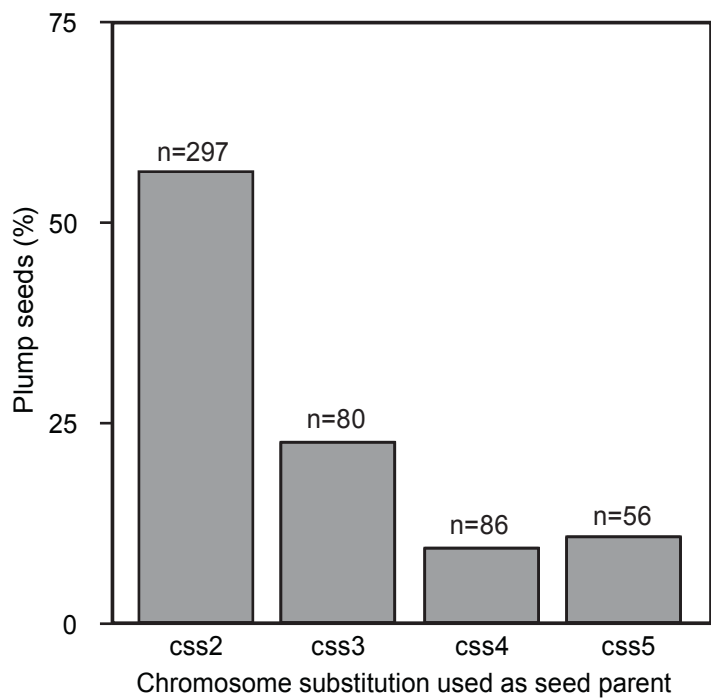

**Supplemental figure S2.** Substitution of Ler chromosome two in a Col background (C<sub>ss2</sub>) dramatically increases the frequency of live seed in the progeny of crosses to tetraploid Col (Y axis). No other chromosome provided a dramatic increase over the control 2x Col X 4x Col crosses (Figure 1).
